# Supplementary material for: Isolation of neoantigen-specific T cells from tumor and peripheral lymphocytes
Source: JCI journal article supplement (doi:10.1172/jci82416), 2015-09-20
Supplement: sd1 [file 1]

# Supplemental Figure 1 – Cohen *et al.*

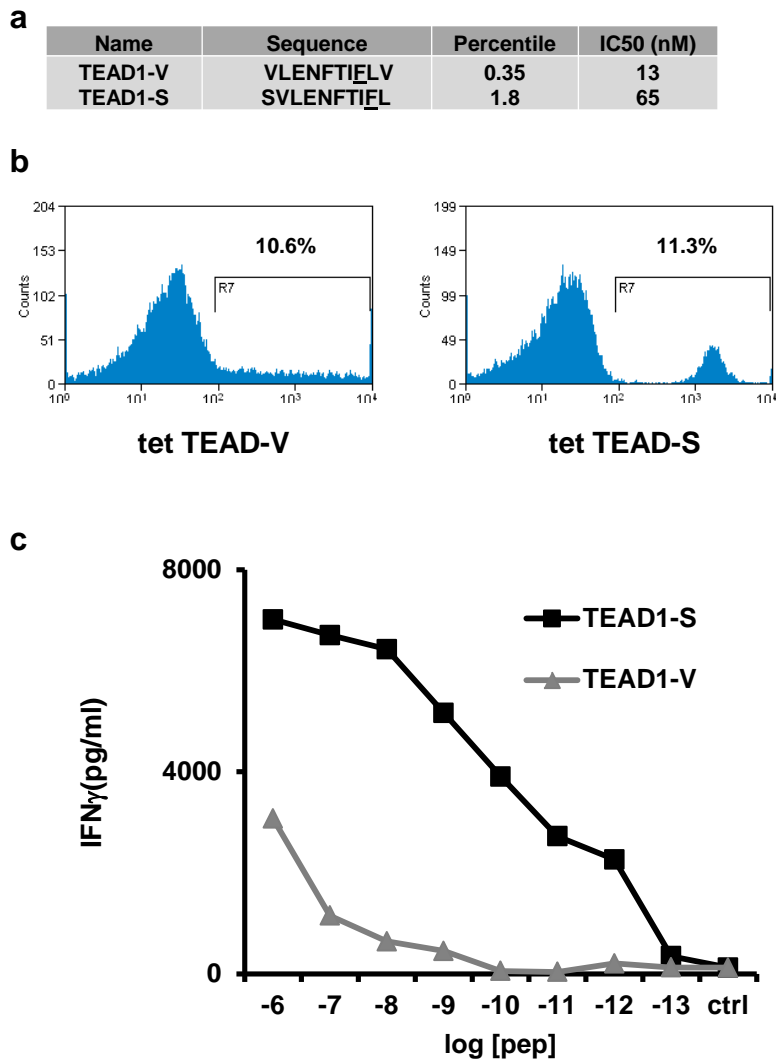

**Supplemental Fig.1:** Analysis of TEAD-1 mutant epitopes. (a) Sequence and predicted affinity of two TEAD-1 mutated peptide. (b) Treatment bulk TIL culture was stained with HLA-A2 tetramers loaded with either TEAD1-V (left panel) or TEAD1-S (right panel) and analyzed by flow cytometry. The percentage of positive cells is indicated. (c) These cells were co-cultured with T2 cells pulsed with different concentrations of either TEAD1-V (diamonds) or TEAD1-S (square) peptide. 16 hrs after the beginning of the co-culture, IFN $\gamma$  secretion in the supernatant was measured by ELISA.

## Supplemental Figure 2 – Cohen *et al.*

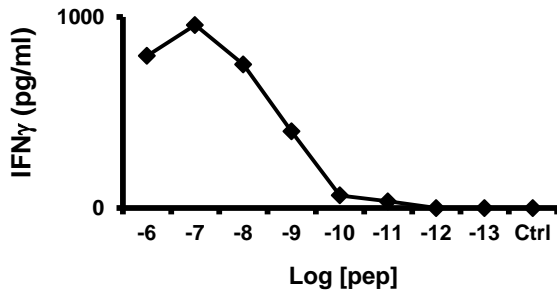

**Supplemental Fig.2:** Reactivity of ANHAK-reactive sorted cells from TIL. TIL from patient 3713, were stained with a mutated AHNAK MHC-tetramer, sorted and then expanded. These T-cells were co-cultured with T2 cells pulsed with the AHNAK mutated epitope at different concentrations (ranging from  $10^{-6}$  to  $10^{-13}$  M) or control peptide (Ctrl – at  $10^{-6}$  M). 16 hrs after the beginning of the co-culture, IFN $\gamma$  secretion was measured in ELISA.
