# Supplementary material for: Isolation of neoantigen-specific T cells from tumor and peripheral lymphocytes
Source: JCI journal article supplement (doi:10.1172/jci82416), 2015-09-20
Supplement: sd2 [file 2]

### **Supplemental Table 1**

Description of patients' demographics (age, sex and response - CR: Complete response, PR: Partial response, NR: Non-responder, +: on-going response) and of the number of non-synonymous somatic mutations for each sample analyzed.

| <b>Patient #</b> | <b>Age at Treatment</b> | <b>Sex</b> | <b>Response (months)</b> | <b># of non-synonymous somatic mutation</b> |
|------------------|-------------------------|------------|--------------------------|---------------------------------------------|
| 3466             | 55                      | M          | CR, 90+                  | 5718                                        |
| <b>3713</b>      | <b>53</b>               | <b>M</b>   | <b>CR, 61+</b>           | <b>10317</b>                                |
| 3702             | 46                      | M          | PR 58+                   | 616                                         |
| <b>3703</b>      | <b>57</b>               | <b>F</b>   | <b>CR, 61</b>            | <b>304</b>                                  |
| 3879             | 60                      | M          | CR, 22                   | 927                                         |
| <b>3903</b>      | <b>56</b>               | <b>M</b>   | <b>PR 43+</b>            | <b>464</b>                                  |
| 3919             | 18                      | F          | NR                       | 752                                         |
| <b>3926</b>      | <b>37</b>               | <b>M</b>   | <b>NR</b>                | <b>499</b>                                  |
